# Supplementary material
Source: publisher figshare collection journal article supplement (https://asha.figshare.com/ndownloader/files/38093877)
Supplement: Supplementary file 1 [file 38093877]

**Supplemental Material S1.** Participant survey on usability of device.

Question 1: How would you describe the amount of training you received from the research staff for use of the Self-Trainer before you had to use it independently?

|                     | Too much training | The right amount of training for independent use | Barely adequate for independent use | Not enough for independent use | No opinion/don't remember |
|---------------------|-------------------|--------------------------------------------------|-------------------------------------|--------------------------------|---------------------------|
| Number of responses | 0                 | 7                                                | 0                                   | 0                              | 0                         |

Question 2: How would you describe the written directions given to you to help you use the Self-Trainer independently?

|                     | Very useful in helping me use the device independently | Moderately useful in helping me use the device independently | Minimally useful in helping me use the device independently | Not useful at all because I already knew how to use the device | Not useful at all because the material was too hard to understand | No opinion/Don't know |
|---------------------|--------------------------------------------------------|--------------------------------------------------------------|-------------------------------------------------------------|----------------------------------------------------------------|-------------------------------------------------------------------|-----------------------|
| Number of responses | 7                                                      | 0                                                            | 0                                                           | 0                                                              | 0                                                                 | 0                     |

Question 3: How would you describe the video directions given to you to help you use the Self-Trainer independently?

|                     | Very useful in helping me use the device independently | Moderately useful in helping me use the device independently | Minimally useful in helping me use the device independently | Not useful at all because I already knew how to use the device | Not useful at all because the material was too hard to understand | No opinion/Don't know |
|---------------------|--------------------------------------------------------|--------------------------------------------------------------|-------------------------------------------------------------|----------------------------------------------------------------|-------------------------------------------------------------------|-----------------------|
| Number of responses | 4                                                      | 0                                                            | 0                                                           | 0                                                              | 0                                                                 | 2                     |

*Note:* one participant did not respond

Question 4: How would you describe the Self-Trainer's as you used it independently?

|                     | Very easy to use independently after training | Easy to use independently | Somewhat easy to use independently after training | Somewhat difficult to use independently after training | Difficult to use independently after training | Very difficult to use independently after training | No opinion/Don't know |
|---------------------|-----------------------------------------------|---------------------------|---------------------------------------------------|--------------------------------------------------------|-----------------------------------------------|----------------------------------------------------|-----------------------|
| Number of responses | 5                                             | 2                         | 0                                                 | 0                                                      | 0                                             | 0                                                  | 0                     |

*Note:* one participant did not respond and one participant provided 2 responses

Question 5: How often did you have to refer back to the education material while you were using the Self-Trainer independently?

|                     | Every time I used the device | The majority of the time (about 80% of the time) | Frequently (about 60% of the time) | Several times (about 40% of the time) | Rarely (less than 20% of the time) | Not once | No opinion/ Don't know |
|---------------------|------------------------------|--------------------------------------------------|------------------------------------|---------------------------------------|------------------------------------|----------|------------------------|
| Number of responses | 0                            | 0                                                | 0                                  | 0                                     | 3                                  | 3        | 0                      |

Note: one participant did not respond

Question 6: How much contact with the research study staff did you feel like you needed in order to use the Self-Trainer independently on a daily basis?

|                     | Daily contact to ask questions | Contact several times a week to ask questions | Contact once a week to ask questions | Contact several times a month to ask questions | Contacted 1-3 times over 3 months to ask questions | Never contacted the staff to ask questions |
|---------------------|--------------------------------|-----------------------------------------------|--------------------------------------|------------------------------------------------|----------------------------------------------------|--------------------------------------------|
| Number of responses | 0                              | 0                                             | 1                                    | 1                                              | 4                                                  | 1                                          |

Note: one participant provided 2 responses; one participant did not respond

Question 7: How much would you describe the size of the Self-Trainer for long term daily use?

|                     | Much too large | Too large | Slightly too large | Fit comfortably, neither too large or too small | Slightly too small | Too small | Much too small | No opinion / Don't know |
|---------------------|----------------|-----------|--------------------|-------------------------------------------------|--------------------|-----------|----------------|-------------------------|
| Number of responses | 1              | 0         | 3                  | 3                                               | 0                  | 0         | 0              | 0                       |

Question 8: How would you describe the number of times the device goes off when the device is set in automatic mode and vibrates every few minutes throughout the day?

|                     | Vibrates much too often | Vibrates somewhat too often | Vibrates just often enough | Vibrates somewhat too infrequently | Vibrates much too infrequently | No opinion/ Don't know |
|---------------------|-------------------------|-----------------------------|----------------------------|------------------------------------|--------------------------------|------------------------|
| Number of responses | 0                       | 0                           | 6                          | 1                                  | 0                              | 0                      |

Question 9: During active swallowing practice, you were asked to turn on the self-trainer vibration and swallow 30 times twice a day. What is your opinion on the number of times you were requested to swallow each day?

|                     | Very difficult | Somewhat difficult | Neither easy nor difficult | Somewhat easy | Very easy | No opinion/ Don't know |
|---------------------|----------------|--------------------|----------------------------|---------------|-----------|------------------------|
| Number of responses | 0              | 1                  | 2                          | 2             | 3         | 0                      |

Note: one participant provided 2 responses

Question 10: How would you describe the appearance of the Self-Trainer?

|                     | I like the appearance very much | The appearance is OK | I find the appearance slightly unattractive | I don't like the appearance at all | No opinion/ Don't know |
|---------------------|---------------------------------|----------------------|---------------------------------------------|------------------------------------|------------------------|
| Number of responses | 1                               | 3                    | 1                                           | 1                                  | 0                      |

Note: one participant did not respond

Question 11: How would you describe your feelings about wearing and using the Self-Trainer in public places?

|                     | Severely self-conscious, would not wear in public anywhere | Moderately self-conscious, would only wear with friends | Minimally self-conscious, would wear with acquaintances | Not self-conscious at all, would wear in public anywhere, with anyone | No opinion/ Don't know |
|---------------------|------------------------------------------------------------|---------------------------------------------------------|---------------------------------------------------------|-----------------------------------------------------------------------|------------------------|
| Number of responses | 2                                                          | 0                                                       | 0                                                       | 5                                                                     | 0                      |

Question 12: How would you describe your comfort while wearing the device?

|                     | Very comfortable | Moderately comfortable | Minimally comfortable | Neither comfortable or uncomfortable | Minimally uncomfortable | Moderately uncomfortable | Severely uncomfortable | No opinion/ Don't know |
|---------------------|------------------|------------------------|-----------------------|--------------------------------------|-------------------------|--------------------------|------------------------|------------------------|
| Number of responses | 1                | 1                      | 2                     | 0                                    | 3                       | 1                        | 0                      | 0                      |

Note: one participant provided 2 responses

Question 13: How long can you wear the Self-Trainer comfortably?

|                               | All day,<br>about 12<br>hours | Most of<br>the day,<br>about 8-<br>11 hours | About<br>half a<br>day, 5-7<br>hours | Less<br>than half<br>a day, 3-<br>4 hours | 1-2<br>hours a<br>day | An hour<br>or less a<br>day | Not any<br>amount<br>of time | No<br>opinion/<br>Don't<br>know |
|-------------------------------|-------------------------------|---------------------------------------------|--------------------------------------|-------------------------------------------|-----------------------|-----------------------------|------------------------------|---------------------------------|
| Number<br>of<br>response<br>s | 1                             | 3                                           | 3                                    | 1                                         | 0                     | 0                           | 0                            | 0                               |

*Note:* one participant provided 2 responses

Question 14: How would you describe your ability to socialize and attend social events in the community while wearing the Self-Trainer?

|                        | Unlimited,<br>attend all<br>functions as<br>usual | Minimally<br>limited,<br>attend most<br>functions<br>that you<br>would<br>normally<br>attend | Moderately<br>limited,<br>attend some<br>functions<br>that you<br>would<br>normally<br>attend | Severely<br>limited,<br>attend only<br>a few of the<br>functions<br>you would<br>normally<br>attend | I would not<br>socialize or<br>attend social<br>functions<br>while<br>wearing the<br>Self-Trainer | No opinion/<br>Don't know |
|------------------------|---------------------------------------------------|----------------------------------------------------------------------------------------------|-----------------------------------------------------------------------------------------------|-----------------------------------------------------------------------------------------------------|---------------------------------------------------------------------------------------------------|---------------------------|
| Number of<br>Responses | 4                                                 | 1                                                                                            | 0                                                                                             | 0                                                                                                   | 2                                                                                                 | 0                         |

Question 15: How would you describe your willingness to use the self-trainer when going out to a restaurant?

|                        | Unlimited,<br>would use<br>self-trainer<br>in all<br>restaurants | Minimally<br>limited,<br>would use<br>the self-<br>trainer in<br>most<br>restaurants | Moderately<br>limited,<br>would use<br>the self-<br>trainer in<br>some<br>restaurants | Severely<br>limited,<br>would use<br>the self-<br>trainer in a<br>few<br>restaurants | I would not<br>use the self-<br>trainer in a<br>restaurant | No opinion/<br>Don't know |
|------------------------|------------------------------------------------------------------|--------------------------------------------------------------------------------------|---------------------------------------------------------------------------------------|--------------------------------------------------------------------------------------|------------------------------------------------------------|---------------------------|
| Number of<br>Responses | 1                                                                | 1                                                                                    | 0                                                                                     | 0                                                                                    | 3                                                          | 1                         |

*Note:* One participant did not respond and instead wrote in "Don't go to restaurants at all." The participant that answered "No opinion/Don't know" also wrote in "If I could eat it would be no problem."

Question 16: How much did you rely on your swallowing "coach" for reminders and motivation to complete this three month swallowing retraining program?

|                     | Complete reliance, 100% of the time | High level of reliance, about 75% of the time. | Moderate level of reliance, about 50% of the time. | Low level of reliance, about 25% of the time. | No reliance at all | No opinion/Don't know |
|---------------------|-------------------------------------|------------------------------------------------|----------------------------------------------------|-----------------------------------------------|--------------------|-----------------------|
| Numbers of Response | 1                                   | 0                                              | 1                                                  | 0                                             | 4                  | 1                     |

*Note:* The participant that responded with "No reliance at all" also wrote in "I didn't need any reminders at all."

Question 17: Considering all aspects of the self-trainer, including the design, appearance, and use, what changes would you make to the self-trainer?

Themes: Negative, Positive, Suggestions, and Other

**Negative:**

|                     | Too big | Difficult to use | Uncomfortable |
|---------------------|---------|------------------|---------------|
| Number of responses | 4       | 1                | 1             |

**Positive:**

|                     | Improved swallowing |
|---------------------|---------------------|
| Number of responses | 2                   |

**Suggestions for the Device:**

|                     | Suggest more durable | Suggest adding pulsing feature to device | Suggest adding counting/measurement to device | Suggest larger vibrations | Suggest wireless |
|---------------------|----------------------|------------------------------------------|-----------------------------------------------|---------------------------|------------------|
| Number of responses | 2                    | 1                                        | 1                                             | 2                         | 1                |

**Other:**

|                     | Wish to eat more food | Forgot to charge |
|---------------------|-----------------------|------------------|
| Number of responses | 1                     | 1                |
